# Supplementary material for: An open framework crystal structure and physical properties of RbCuAl(PO4)2
Source: Royal Society of Chemistry journal article supplement (doi:10.1039/c5dt04543f), 2015-12-10
Supplement: c5dt04543f2.pdf [file c5dt04543f2.pdf]

# An open framework crystal structure and physical properties of $\text{RbCuAl}(\text{PO}_4)_2$

*O. V. Yakubovich,<sup>a</sup> G. V. Kiriukhina,<sup>a</sup> O. V. Dimitrova,<sup>a</sup> E. A. Zvereva,<sup>a</sup> L. V. Shvanskaya,<sup>a,b</sup> O.*

*S. Volkova<sup>a,b,c</sup> and A. N. Vasiliev<sup>a,b,c</sup>*

<sup>a</sup>M.V. Lomonosov Moscow State University, Moscow 119991, Russia

<sup>b</sup>National University of Science and Technology "MISIS", Moscow 119049, Russia

<sup>c</sup>Ural Federal University, Ekaterinburg 620002, Russia

**Table S1.** Atomic Coordinates and Equivalent Isotropic Displacement Parameters ( $\text{\AA}^2$ )

| Atom | $x/a$       | $y/b$       | $z/c$       | $U_{\text{eq}}/ U_{\text{iso}}$ |
|------|-------------|-------------|-------------|---------------------------------|
| Rb1  | 1.21380(8)  | 0.17410(3)  | 0.78709(4)  | 0.02163(13)                     |
| Cu1  | 1.23747(8)  | 0.45747(3)  | 0.95106(5)  | 0.01172(13)                     |
| P1   | 0.72625(17) | 0.32801(6)  | 0.95098(10) | 0.00910(19)                     |
| P2   | 1.28036(17) | 0.48791(6)  | 0.66494(10) | 0.00959(19)                     |
| Al1  | 0.7540(2)   | 0.37047(7)  | 0.61129(12) | 0.0091(2)                       |
| O1   | 0.7703(5)   | 0.42219(17) | 0.4248(3)   | 0.0153(5)                       |
| O2   | 1.4127(5)   | 0.40983(17) | 0.5879(3)   | 0.0137(5)                       |
| O3   | 0.4349(5)   | 0.34030(16) | 0.9698(3)   | 0.0131(5)                       |
| O4   | 0.7491(5)   | 0.31148(17) | 0.7926(3)   | 0.0133(5)                       |
| O5   | 1.4524(5)   | 0.51013(17) | 0.8134(3)   | 0.0117(5)                       |
| O6   | 1.0119(5)   | 0.44928(17) | 0.6976(3)   | 0.0146(5)                       |
| O7   | 0.9046(5)   | 0.41436(16) | 1.0148(3)   | 0.0110(5)                       |
| O8   | 0.8431(5)   | 0.25817(16) | 0.5409(3)   | 0.0122(5)                       |

**Table S2.** RbCuAl(PO<sub>4</sub>)<sub>2</sub>. Bond-valence data

| Atom     | Rb           | Cu           | Al    | P1    | P2    | $\Sigma$ |
|----------|--------------|--------------|-------|-------|-------|----------|
| O1       | 0.086; 0.070 |              | 0.503 |       | 1.314 | 1.97     |
| O2       | 0.097        |              | 0.681 |       | 1.248 | 2.03     |
| O3       | 0.111; 0.046 | 0.487        |       | 1.262 |       | 1.91     |
| O4       | 0.095; 0.050 |              | 0.520 | 1.279 |       | 1.94     |
| O5       | 0.085        | 0.421; 0.100 |       |       | 1.248 | 1.85     |
| O6       | 0.045        | 0.119        | 0.683 |       | 1.202 | 2.05     |
| O7       | 0.106        | 0.411; 0.405 |       | 1.139 |       | 2.06     |
| O8       | 0.124; 0.041 |              | 0.669 | 1.251 |       | 2.08     |
| $\Sigma$ | 0.96         | 1.94         | 3.06  | 4.93  | 5.01  |          |
